# Supplementary material for: Cancer-initiating cells derived from human rectal adenocarcinoma tissues carry mesenchymal phenotypes and resist drug therapies
Source: PubMed Central journal article supplement — Cell Death Dis. 2013 Oct 3;4(10):e828–. doi: 10.1038/cddis.2013.337 (PMC3824647; doi:10.1038/cddis.2013.337), 2013-10-03
Supplement: cddis2013337x1.pdf [file cddis2013337x1.pdf]

# Supplementary Figure 1

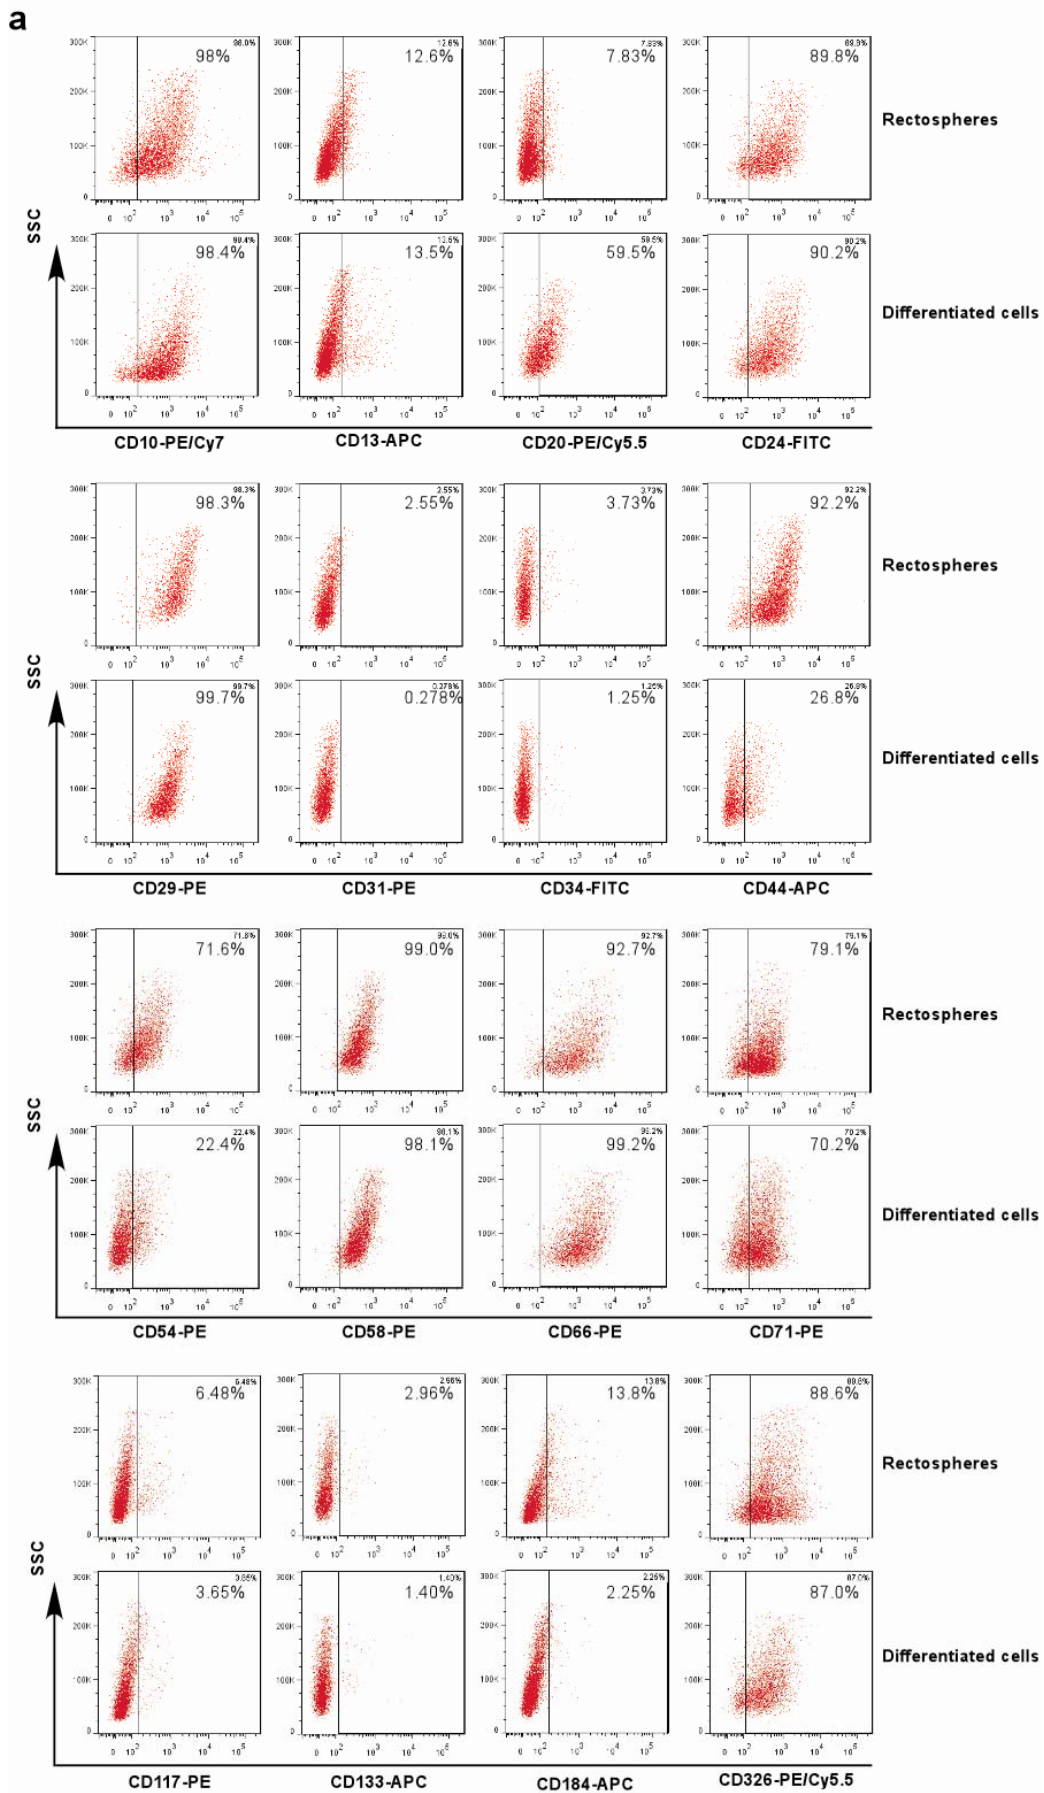

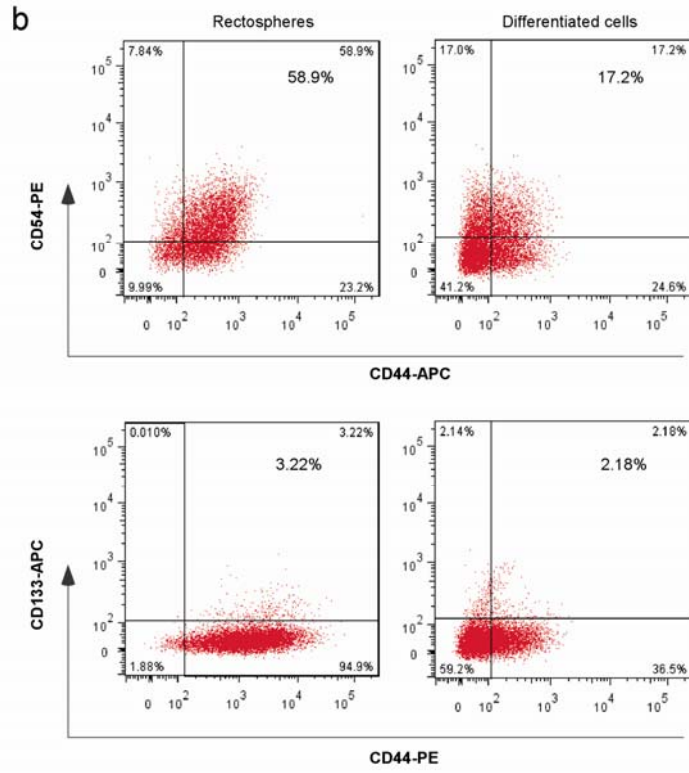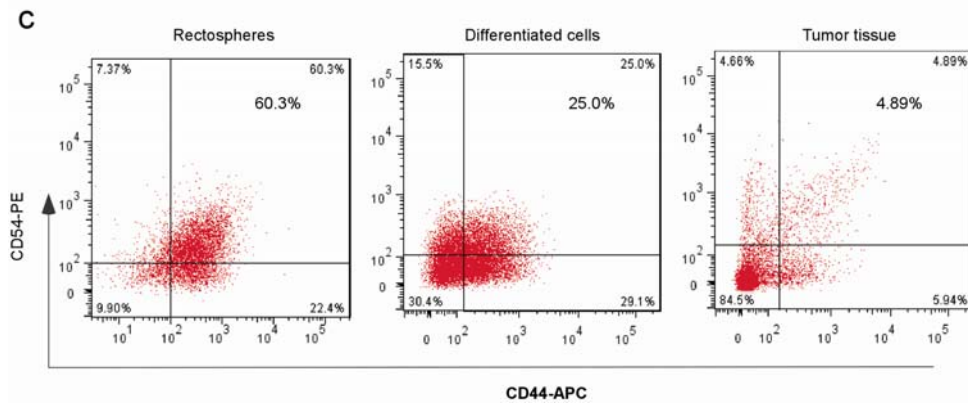

## Supplementary Figure 2

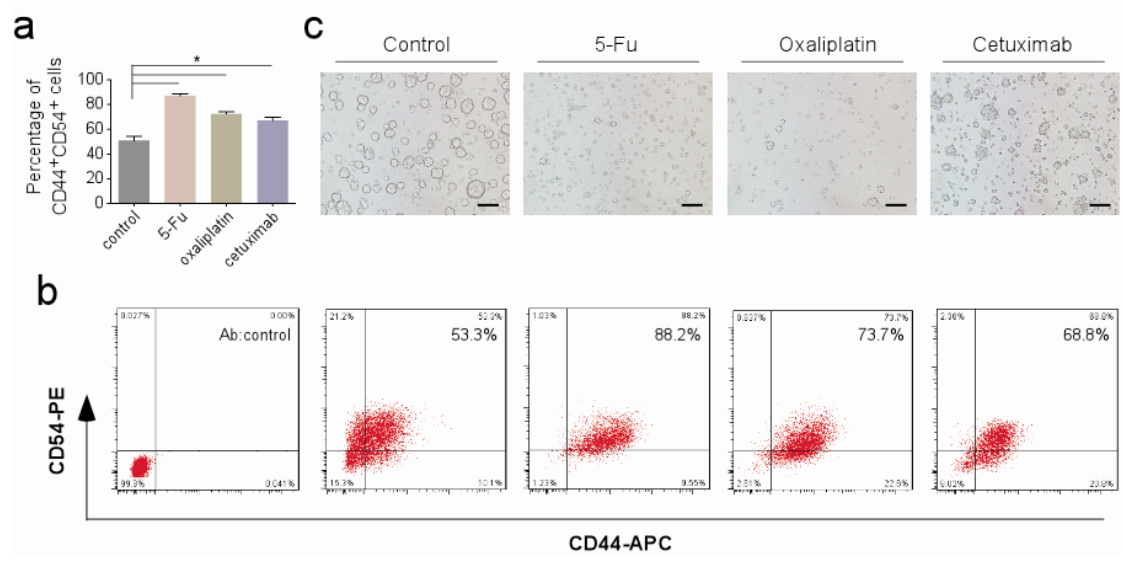

**Supplementary Figure 3**

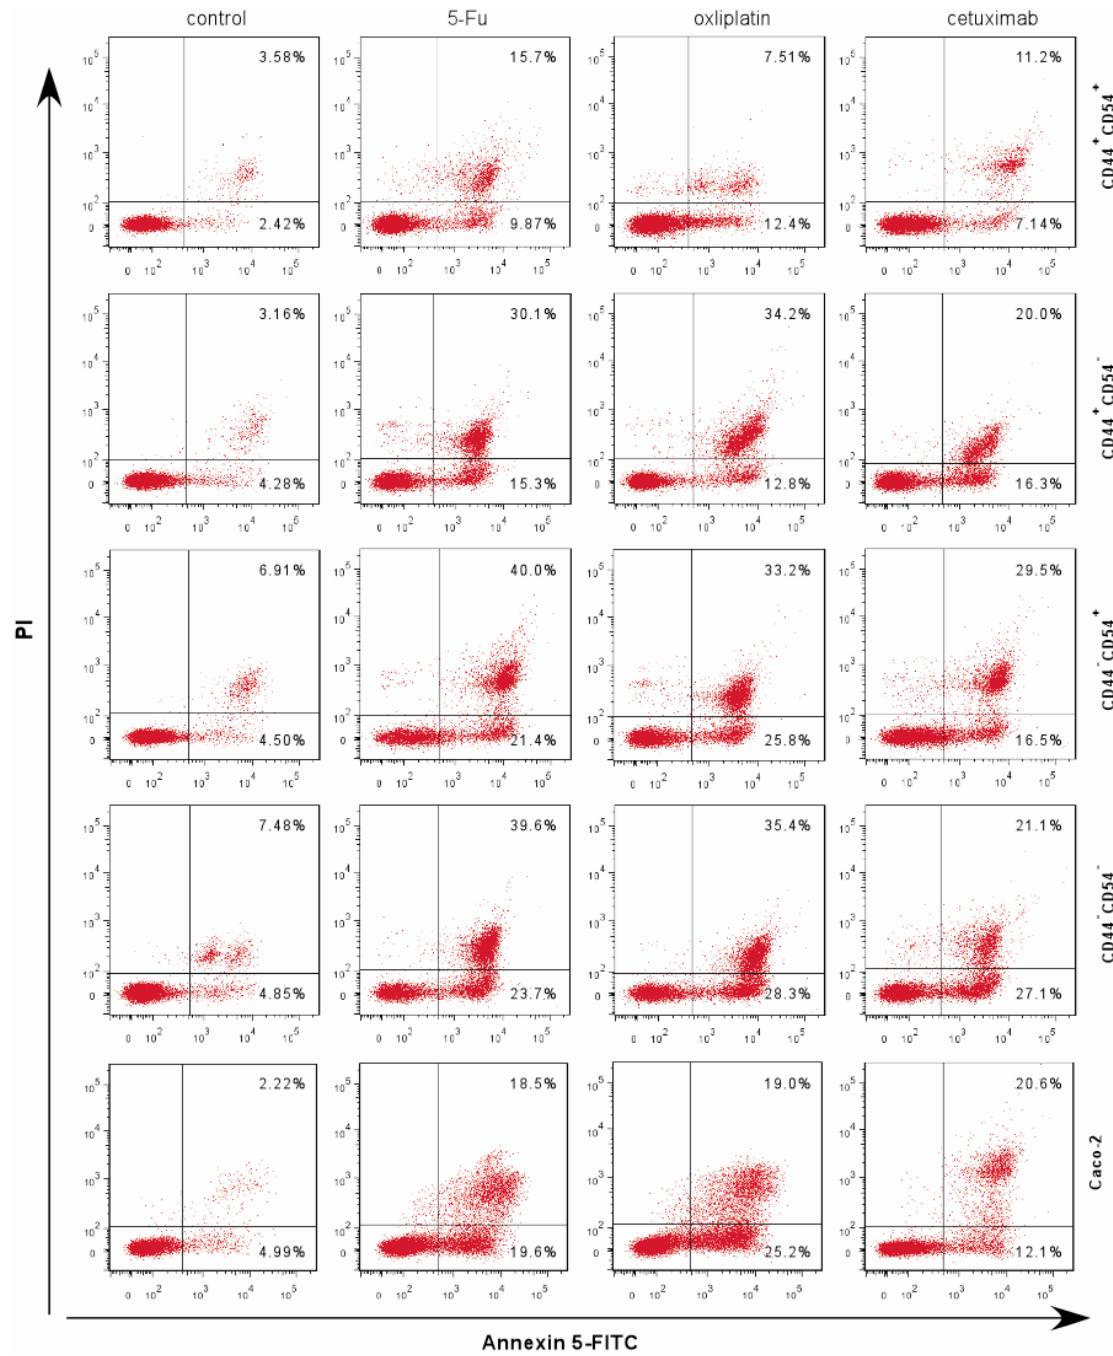

Supplementary Figure 4

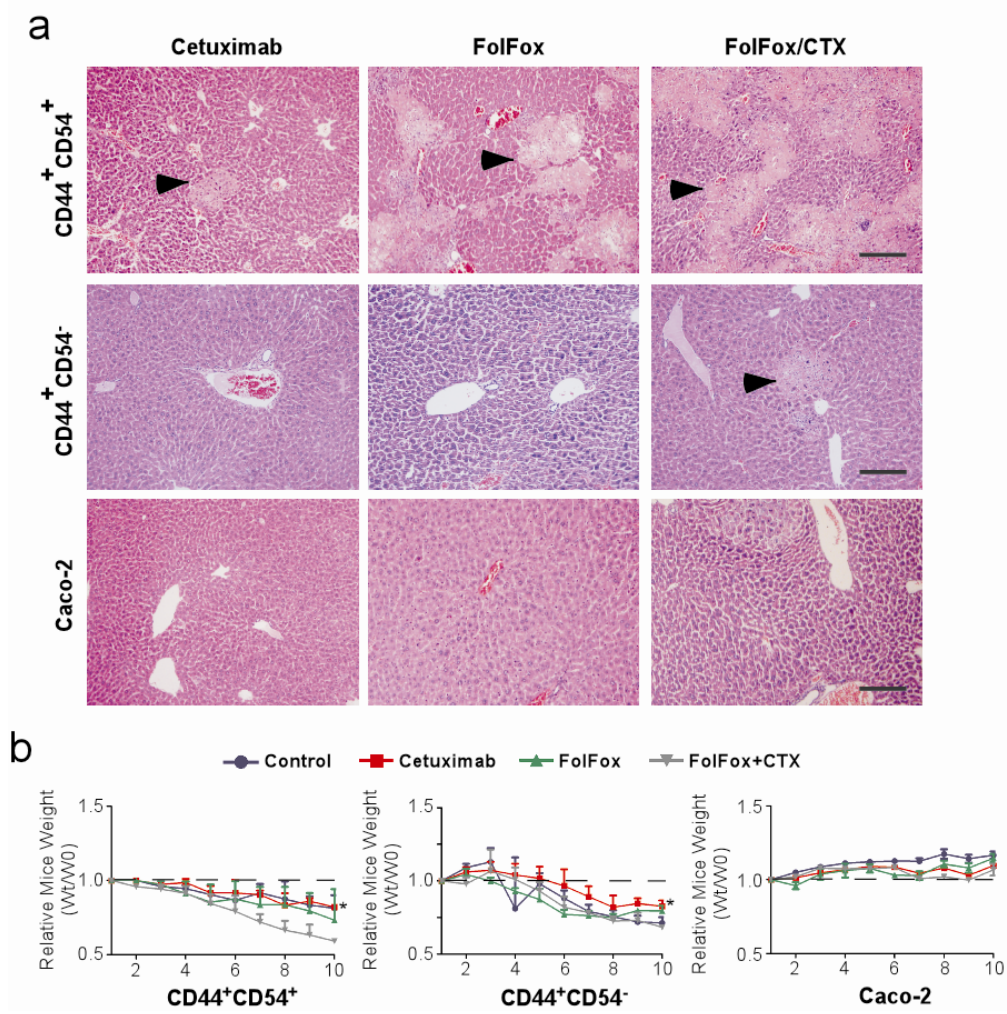

**Supplementary Table 1. Case description of rectal cancer cells**

| Case | Gender | Age | Grade            | Dukes stage | Sphere formation |
|------|--------|-----|------------------|-------------|------------------|
| 1    | male   | 57  | Moderate         | C           | No               |
| 2    | male   | 37  | Mucinous         | C           | No               |
| 3    | male   | 69  | Moderate to Poor | C           | No               |
| 4    | male   | 44  | Moderate         | C           | Yes              |
| 5    | male   | 34  | Moderate         | C           | Yes              |
| 6    | female | 45  | Moderate         | C           | Yes              |
| 7    | male   | 78  | Moderate         | C           | No               |
| 8    | female | 38  | Moderate         | C           | No               |
| 9    | female | 55  | Moderate         | B           | Yes              |
| 10   | male   | 38  | Moderate         | B           | No               |
| 11   | male   | 48  | Moderate         | C           | Yes              |
| 12   | female | 62  | Moderate         | C           | No               |
| 13   | male   | 44  | Moderate         | C           | No               |
| 14   | female | 76  | Moderate         | B           | No               |
| 15   | female | 62  | Moderate         | A           | Yes              |
| 16   | male   | 66  | Moderate         | B           | Yes              |
| 17   | male   | 73  | Moderate         | B           | No               |
| 18   | female | 49  | Moderate to Poor | B           | No               |
| 19   | male   | 55  | Moderate         | C           | No               |
| 20   | female | 75  | Moderate         | B           | Yes              |
| 21   | male   | 61  | Moderate         | C           | No               |
| 22   | female | 39  | Mucinous         | C           | Yes              |
| 23   | male   | 71  | Moderate         | B           | No               |
| 24   | male   | 72  | Moderate         | C           | Yes              |
| 25   | male   | 74  | Moderate         | B           | No               |
| 26   | male   | 86  | Poor             | C           | No               |

|    |        |    |                  |   |     |
|----|--------|----|------------------|---|-----|
| 27 | female | 70 | Moderate to Poor | B | Yes |
| 28 | male   | 64 | Moderate         | B | No  |
| 29 | male   | 69 | Moderate         | C | Yes |
| 30 | female | 51 | Moderate         | C | No  |
| 31 | female | 72 | Moderate         | B | NA  |
| 32 | male   | 69 | Moderate to Poor | C | NA  |
| 33 | male   | 48 | Moderate         | C | NA  |

**Supplementary Table 2. Survival of mice-bearing derived from different cell subpopulation and treated with drugs therapy**

| Cell populations | Drugs            | Media survival(%) | Survival at 90 d(%) | Survival at 120 d(%) | <i>P</i> value |
|------------------|------------------|-------------------|---------------------|----------------------|----------------|
| CD44+CD54+       | Cetuximab        | 86                | 50                  | 0                    | 0.748          |
|                  | FolFox           | 73.5              | 16.67               | 0                    | 0.824          |
|                  | FolFox+Cetuximab | 77                | 0                   | 0                    | 0.207          |
|                  | control          | 80                | 40                  | 0                    | -              |
| CD44+CD54-       | Cetuximab        | 90.5              | 50                  | NA                   | 0.012          |
|                  | FolFox           | 92.5              | 66.67               | NA                   | 0.001          |
|                  | FolFox+Cetuximab | 83.5              | 33.33               | NA                   | 0.067          |
|                  | control          | 73.5              | 0                   | NA                   | -              |
| Caco-2           | Cetuximab        | Underdefined *    | 100                 | 66.67                | 0.003          |
|                  | FolFox           | Underdefined *    | 100                 | 83.33                | 0.003          |
|                  | FolFox+Cetuximab | Underdefined *    | 100                 | 83.33                | 0.003          |
|                  | Control          | 80                | 20                  | 0                    | -              |

NA, Not assessed
